# Supplementary material for: Removal of Cd(II) and Cu(II) from Aqueous Solution by Na+-Modified Pisha Sandstone
Source: Hindawi journal article supplement (doi:10.1155/2020/2805479), 2020-03-09
Supplement: f1 [file 2805479.f1.pdf]

506 **Supplemental information**

507 Table S1: Kinetic parameters of Cd(II) and Cu(II) adsorption on PS and Na-PS.

|                      | $q_{e.exp}$<br>(mg g <sup>-1</sup> ) | Pseudo first order quation     |                                                  |       | Pseudo second order quation   |                                                  |       | Elovich model |       |       |      |
|----------------------|--------------------------------------|--------------------------------|--------------------------------------------------|-------|-------------------------------|--------------------------------------------------|-------|---------------|-------|-------|------|
|                      |                                      | $q_f$<br>(mg g <sup>-1</sup> ) | $K_f$<br>(g mg <sup>-1</sup> min <sup>-1</sup> ) | $R^2$ | $q_s$<br>(m g <sup>-1</sup> ) | $K_s$<br>(g mg <sup>-1</sup> min <sup>-1</sup> ) | $R^2$ | $a$           | $b$   | $R^2$ |      |
| Cd(II)               | PS                                   |                                |                                                  |       |                               |                                                  |       |               |       |       |      |
|                      | 1×10 <sup>-3</sup> M                 | 2.65                           | 2.7                                              | 0.85  | 0.98                          | 2.67                                             | -7.39 | 0.99          | 4865  | 5.52  | 0.38 |
|                      | 2×10 <sup>-3</sup> M                 | 4.34                           | 4.25                                             | 0.9   | 0.98                          | 4.32                                             | 0.13  | 0.99          | 6132  | 3.44  | 0.43 |
|                      | 3×10 <sup>-3</sup> M                 | 5.29                           | 5.3                                              | 0.93  | 0.99                          | 5.29                                             | 0.28  | 0.99          | 31190 | 3.05  | 0.42 |
|                      | Na-PS                                |                                |                                                  |       |                               |                                                  |       |               |       |       |      |
|                      | 1×10 <sup>-3</sup> M                 | 3.02                           | 3.06                                             | 0.96  | 0.99                          | 3.03                                             | -5.57 | 0.99          | 29482 | 5.45  | 0.38 |
|                      | 2×10 <sup>-3</sup> M                 | 4.79                           | 4.79                                             | 0.89  | 0.97                          | 4.8                                              | 0.24  | 0.99          | 7853  | 3.09  | 0.38 |
| 3×10 <sup>-3</sup> M | 5.83                                 | 5.89                           | 0.99                                             | 0.99  | 5.85                          | 4.34                                             | 0.99  | 84368         | 2.9   | 0.41  |      |
| Cu(II)               | PS                                   |                                |                                                  |       |                               |                                                  |       |               |       |       |      |
|                      | 1×10 <sup>-3</sup> M                 | 3.05                           | 2.79                                             | 0.63  | 0.93                          | 3.08                                             | 0.06  | 0.99          | 23.7  | 3.17  | 0.92 |
|                      | 2×10 <sup>-3</sup> M                 | 5.3                            | 4.83                                             | 0.52  | 0.95                          | 5.34                                             | 0.03  | 0.99          | 19.2  | 1.66  | 0.87 |
|                      | 3×10 <sup>-3</sup> M                 | 6.7                            | 6.08                                             | 0.62  | 0.94                          | 6.76                                             | 0.02  | 0.99          | 42.1  | 1.42  | 0.8  |
|                      | Na-PS                                |                                |                                                  |       |                               |                                                  |       |               |       |       |      |
|                      | 1×10 <sup>-3</sup> M                 | 3.08                           | 3.06                                             | 0.96  | 0.99                          | 3.11                                             | 0.09  | 0.99          | 981   | 4.45  | 0.93 |
|                      | 2×10 <sup>-3</sup> M                 | 5.44                           | 4.79                                             | 0.89  | 0.98                          | 5.48                                             | 0.04  | 0.99          | 81.6  | 1.89  | 0.79 |
| 3×10 <sup>-3</sup> M | 6.99                                 | 6.34                           | 0.62                                             | 0.95  | 7.04                          | 0.02                                             | 0.99  | 49.3          | 1.38  | 0.82  |      |

508 Note:  $q_{e.exp}$  is experimental data; PS means Pisha sandstone; Na-PS means Pisha sandstone modified with Na<sup>+</sup>.

Table S2: Isothermal parameters of Cd(II) and Cu(II) adsorption on PS and Na-PS.

| Metal  |       | $q_{e.exp}$<br>(mg g <sup>-1</sup> ) | Langmuir model                 |                                            |       | Freundlich model |       |       | Temkin model                 |      |       |
|--------|-------|--------------------------------------|--------------------------------|--------------------------------------------|-------|------------------|-------|-------|------------------------------|------|-------|
|        |       |                                      | $q_m$<br>(mg g <sup>-1</sup> ) | $K$<br>(dm <sup>3</sup> mg <sup>-1</sup> ) | $R^2$ | $K_f$            | $1/n$ | $R^2$ | $A$<br>(mg L <sup>-1</sup> ) | $B$  | $R^2$ |
| Cd(II) | PS    | 11.97                                | 12.79                          | 0.01                                       | 0.96  | 0.46             | 0.50  | 0.99  | 19.59                        | 0.51 | 0.83  |
|        | Na-PS | 11.24                                | 12.81                          | 0.01                                       | 0.99  | 0.89             | 0.41  | 0.96  | 10.92                        | 0.49 | 0.93  |
| Cu(II) | PS    | 18.16                                | 19.49                          | 0.01                                       | 0.96  | 1.78             | 0.37  | 0.99  | 3.66                         | 0.36 | 0.85  |
|        | Na-PS | 19.58                                | 21.37                          | 0.01                                       | 0.95  | 1.93             | 0.38  | 0.96  | 1.90                         | 0.34 | 0.80  |

509 Note:  $q_{e.exp}$  is experimental data; PS means Pisha sandstone; Na-PS means Pisha sandstone modified with Na<sup>+</sup>.
